# Supplementary material
Source: PubMed Central journal article supplement (PMC4158411)

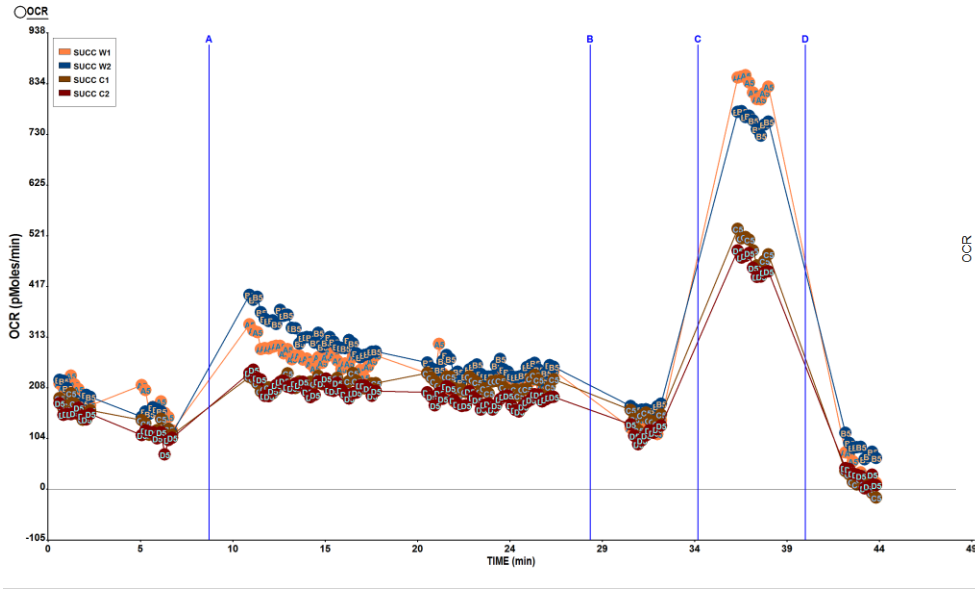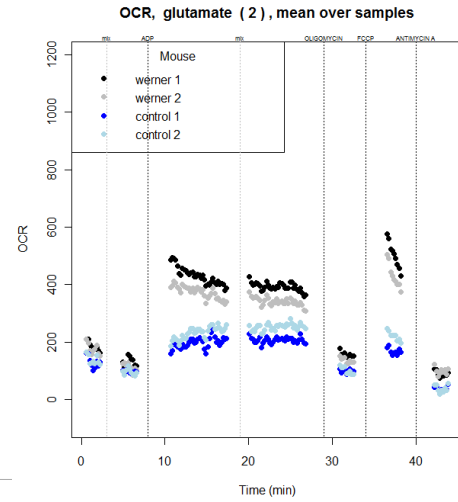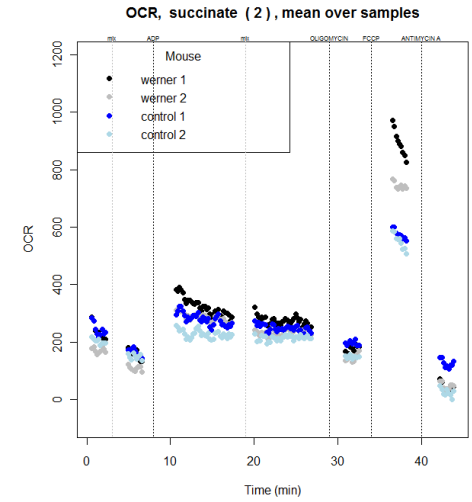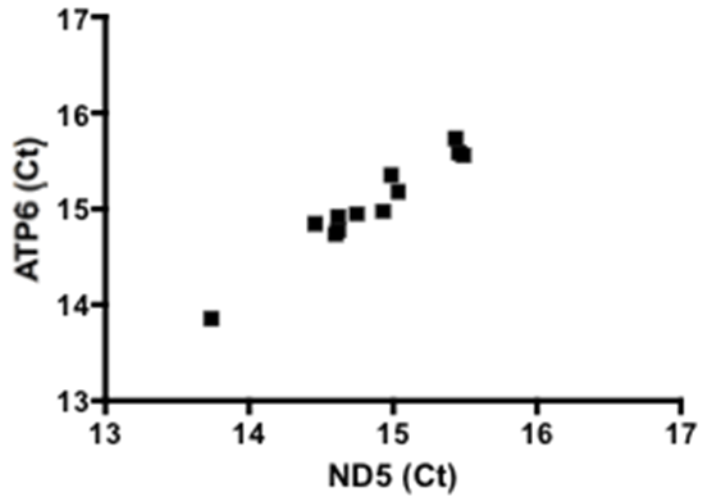

Supplement: supp_glt169_Supplementary_figure_1.pdf [file supp_glt169_Supplementary_figure_1.pdf]
